# Supplementary material for: p27Kip1 Deficiency Impairs Brown Adipose Tissue Function Favouring Fat Accumulation in Mice
Source: MDPI journal article supplement (doi:10.3390/ijms24032664), 2023-01-31
Supplement: s1 [file s1]

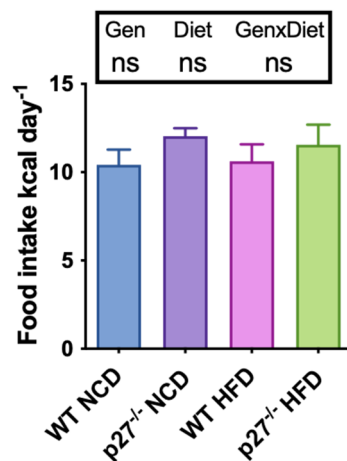

**Supplemental Figure S1.** Daily food intake in WT and p27<sup>-/-</sup> mice fed with NCD or HFD for 10 weeks. Legend above subfigures shows the result of the two-way ANOVA analysis; ns: non significant. Data are presented as mean  $\pm$  SEM (n=4-7).

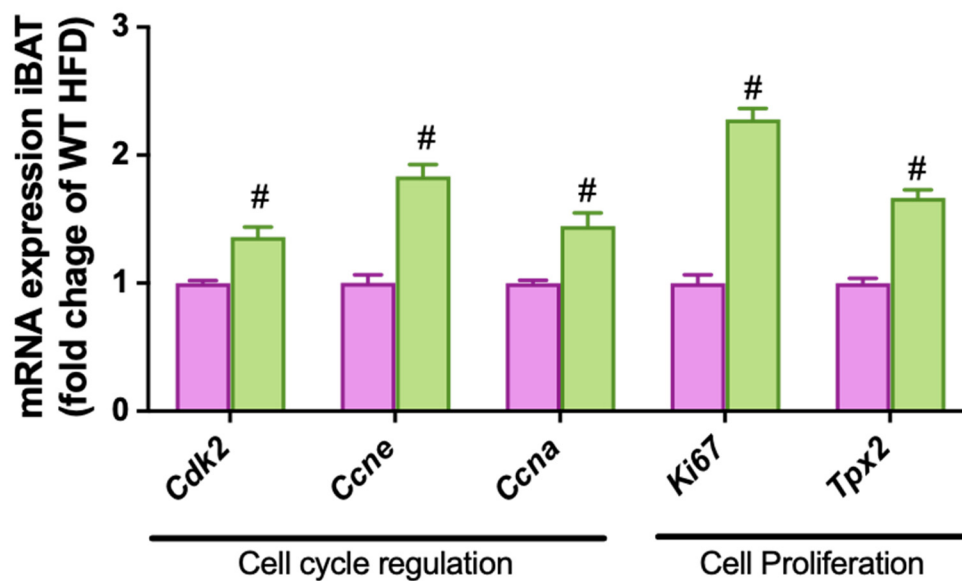

**Supplemental Figure S2.** mRNA expression analysis of genes involved in cell cycle regulation and in cell proliferation in iBAT of WT and p27<sup>-/-</sup> male mice fed with HFD for 10 weeks. Data are expressed as mean  $\pm$  SEM (n=3-7). \*p<0.05 vs. WT HFD.

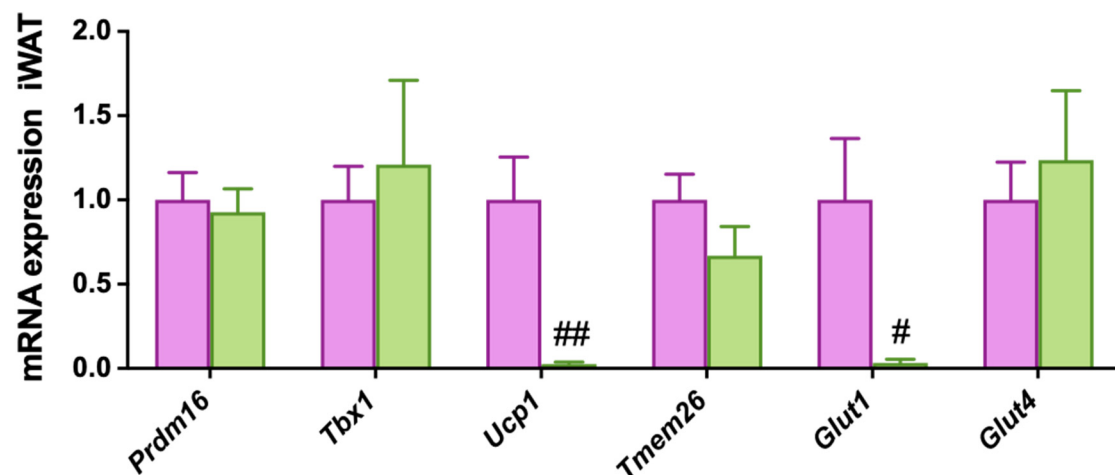

**Supplemental Figure S3.** iWAT of *p27*<sup>-/-</sup> HFD mice have increased adipocyte size and decreased expression of *Ucp1* and *Glut1*. (a-b) Representative histological images (a) and adipocyte area quantification (b) of the iWAT of WT and *p27*<sup>-/-</sup> mice fed with HFD for 10 weeks. (c) mRNA expression levels of relevant genes for adipose tissue browning and glucose uptake in WT and *p27*<sup>-/-</sup> mice fed with HFD for 10 weeks. Data are expressed as mean  $\pm$  SEM (n=5-9). #p<0.05, ##p<0.01, ###p<0.001 vs. WT HFD.

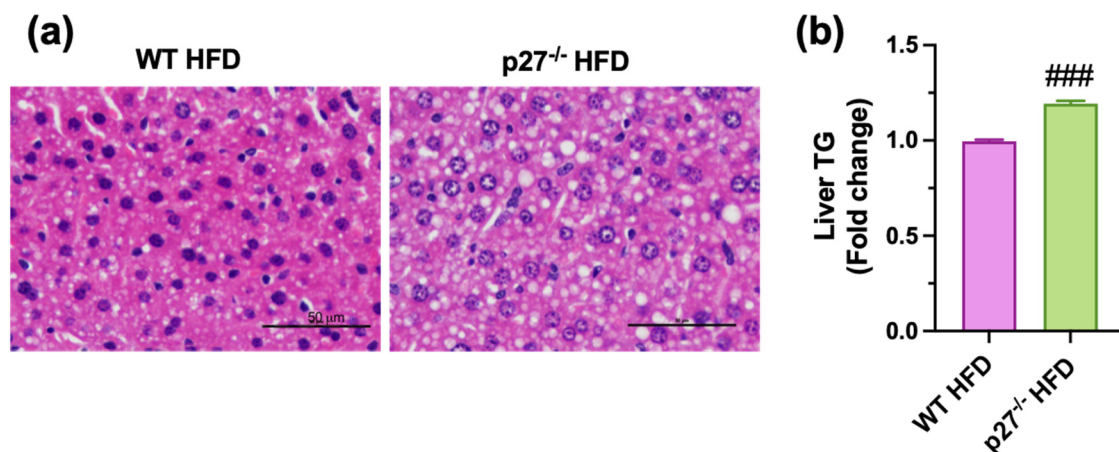

**Supplemental Figure S4.** Representative histological images (a) and hepatic triglyceride content (b) of the liver of WT and *p27*<sup>-/-</sup> mice fed with HFD for 10 weeks. Bar = 50  $\mu$ m. ###p<0.001 vs. WT HFD. (n=7-9)
